# Supplementary material for: Integrative genome-wide analysis reveals the role of WIP proteins in inhibition of growth and development
Source: PubMed Central journal article supplement (PMC7229033; doi:10.1038/s42003-020-0969-2), 2020-05-15
Supplement: 42003_2020_969_MOESM9_ESM.pdf [file 42003_2020_969_MOESM9_ESM.pdf]

**Supplementary Data 1. WIP related genomic regions identified by ChIP-Seq experiments.** Genomic regions identified as commonly enriched in the *Dex:TT1* and *Dex:NTT* ChIP-Seq experiments. Genomic region coordinates (start and end of peaks, according to the TAIR genome release 10), as well as peak score, distance to TSS and peak position are listed.

**Supplementary Data 2. Differentially enriched genes (DEGs) identified by RNA-seq.** Differentially enriched genes (DEGs) found on *Dex:TT1* and *Dex:NTT* transgenic lines compared to *Dex:GR* control lines (FDR < 0.05, FC log<sub>2</sub> ±2.0) identified by RNA-seq.

**Supplementary Data 3. Putative direct target genes of WIP proteins.** Putative direct target genes of TT1 and NTT identified by combination of ChIP-Seq and RNA-seq data.

**Supplementary Data 4. Enriched GO terms associated with the WIP function.** GO term analyses identified in putative direct target of TT1 and NTT using Rstudio.

**Supplementary Data 5. List of primers.** Primers used for cloning, RT-qPCR and ChIP-qPCR analyses.
